# Supplementary material for: The impact of preoperative glycated hemoglobin (HbA1c) on postoperative complications after elective major abdominal surgery: a meta-analysis
Source: PubMed Central journal article supplement — Korean J Anesthesiol. 2021 Oct 8;75(1):47–60. doi: 10.4097/kja.21295 (PMC8831432; doi:10.4097/kja.21295), 2021-10-08
Supplement: kja-21295-suppl1.pdf [file kja-21295-suppl1.pdf]

## Supplementary Digital Content 1. Search strategy PUBMED and MEDLINE

- #1 HbA1c[Title/Abstract]
- #2 Glycated hemoglobin a1c[Title/Abstract]
- #3 Glycemic control[Title/Abstract]
- #4 Glycosylated hemoglobin a1c[Title/Abstract]
- #5 OR/#1-#4
- #6 Abdominal surgery[Title/Abstract]
- #7 General surgery[Title/Abstract]
- #8 Lower gastrointestinal surgery[Title/Abstract]
- #9 Colorectal surgery[Title/Abstract]
- #10 Upper gastrointestinal surgery[Title/Abstract]
- #11 Urology[Title/Abstract]
- #12 OR/#6-#11
- #13 #5 AND #12

### Embase

- #1 (hba1c or glycated haemoglobin a1c or glycemic control or glycosylated haemoglobin a1c).ab.
- #2 (abdominal surgery or general surgery or lower gastrointestinal surgery or colorectal surgery or upper gastrointestinal surgery or urology).ab.
- #3 #1 AND #2

### Cochrane Central Register of Controlled Trials (CENTRAL)

- #1 "HbA1c":ti,ab,kw OR (glycated haemoglobin A1C):ti,ab,kw OR (glycemic control):ti,ab,kw OR (glycosylated haemoglobin a1c):ti,ab,kw (Word variations have been searched)
- #2 (abdominal surgery):ti,ab,kw OR (general surgery):ti,ab,kw OR (lower gastrointestinal surgery):ti,ab,kw OR (colorectal surgery):ti,ab,kw OR (upper gastrointestinal surgery):ti,ab,kw OR (urology):ti,ab,kw

### Google Scholar

((hba1c) OR (glycated h(a)emoglobin a1c) OR (glyc(a)emic control) OR (glycosylated haemoglobin a1c)) AND ((abdominal surgery) OR (general surgery) OR (lower gastrointestinal surgery) OR (colorectal surgery) OR (upper gastrointestinal surgery) OR (urology))

### China Knowledge Resource Integrated Database (CNKI)

Translated to Chinese with official translator

((hba1c) OR (glycated h(a)emoglobin a1c) OR (glyc(a)emic control) OR (glycosylated haemoglobin a1c)) AND  
((abdominal surgery) OR (general surgery) OR (lower gastrointestinal surgery) OR (colorectal surgery) OR  
(upper gastrointestinal surgery) OR (urology))
