# Supplementary material for: The impact of preoperative glycated hemoglobin (HbA1c) on postoperative complications after elective major abdominal surgery: a meta-analysis
Source: PubMed Central journal article supplement — Korean J Anesthesiol. 2021 Oct 8;75(1):47–60. doi: 10.4097/kja.21295 (PMC8831432; doi:10.4097/kja.21295), 2021-10-08
Supplement: kja-21295-suppl2.pdf [file kja-21295-suppl2.pdf]

**Supplementary Digital Content 2. Thresholds for converting the Newcastle-Ottawa scales to AHRQ standards.**

| <b>Quality</b> | <b>Description</b>                                                                                                          |
|----------------|-----------------------------------------------------------------------------------------------------------------------------|
| Good           | 3 or 4 stars in selection domain AND<br>1 or 2 stars in comparability domain AND<br>2 or 3 stars in outcome/exposure domain |
| Fair           | 2 stars in selection domain AND<br>1 or 2 stars in comparability domain AND<br>2 or 3 stars in outcome/exposure domain      |
| Poor           | 0 or 1 star in selection domain OR<br>0 stars in comparability domain OR<br>0 or 1 stars in outcome/exposure domain         |
