# Supplementary material for: The impact of preoperative glycated hemoglobin (HbA1c) on postoperative complications after elective major abdominal surgery: a meta-analysis
Source: PubMed Central journal article supplement — Korean J Anesthesiol. 2021 Oct 8;75(1):47–60. doi: 10.4097/kja.21295 (PMC8831432; doi:10.4097/kja.21295), 2021-10-08
Supplement: kja-21295-suppl3.pdf [file kja-21295-suppl3.pdf]

### Supplementary Digital Content 3. Newcastle-Ottawa Scale for Risk of Bias Assessment of Studies

| Study                                 | Selection |   |   |   | Comparability | Outcome |   |   | Total | AHRQ standard |
|---------------------------------------|-----------|---|---|---|---------------|---------|---|---|-------|---------------|
|                                       | 1         | 2 | 3 | 4 | 5             | 6       | 7 | 8 |       |               |
| Lee et al., 2015 <sup>37</sup>        | *         | * | * | * | **            | *       |   |   | 7/9   | Poor          |
| Gustafsson et al., 2009 <sup>27</sup> | *         | * | * | * | **            | *       | * | * | 9/9   | Good          |
| Goh et al., 2017 <sup>35</sup>        | *         | * | * | * | **            | *       | * | * | 9/9   | Good          |
| Goodenough et al. 2015 <sup>24</sup>  | *         | * | * |   | **            | *       | * |   | 7/9   | Good          |
| Kamarajah et al., 2018 <sup>26</sup>  | *         | * | * |   | **            | *       | * |   | 7/9   | Good          |
| Huang et al., 2017 <sup>34</sup>      | *         | * | * |   | **            | *       | * |   | 7/9   | Good          |
| Jones et al., 2017 <sup>25</sup>      | *         | * | * | * | **            | *       | * | * | 9/9   | Good          |
| Villamiel et al., 2019 <sup>29</sup>  | *         | * | * | * | **            | *       | * | * | 9/9   | Good          |
| Okamura et al., 2017 <sup>38</sup>    | *         | * | * | * | **            | *       | * | * | 9/9   | Good          |
| Oh et al., 2018 <sup>28</sup>         | *         | * | * | * | **            | *       | * | * | 9/9   | Good          |
| Chen et al., 2018 <sup>33</sup>       | *         | * | * |   | **            | *       |   | * | 7/9   | Good          |
| Zhou et al., 2019 <sup>32</sup>       | *         | * | * | * | **            | *       | * | * | 9/9   | Good          |
| Dai et al., 2017 <sup>31</sup>        | *         | * | * |   | **            | *       | * | * | 8/9   | Good          |
| Zhang et al., 2008 <sup>36</sup>      | *         | * | * |   | **            | *       | * | * | 8/9   | Good          |
| Wang et al., 2010 <sup>30</sup>       | *         | * | * |   | **            | *       | * | * | 8/9   | Good          |

#### ITEMS

1. Representativeness of the exposed cohort
2. Selection of the non-exposed cohort
3. Ascertainment of exposure
4. Demonstration that outcome of interest was not present at start of study
5. Comparability of cohorts on the basis of the design or analysis
6. Assessment of outcome
7. Was follow-up long enough for outcomes to occur
8. Adequacy of follow up of cohorts
