# Supplementary material for: The impact of preoperative glycated hemoglobin (HbA1c) on postoperative complications after elective major abdominal surgery: a meta-analysis
Source: PubMed Central journal article supplement — Korean J Anesthesiol. 2021 Oct 8;75(1):47–60. doi: 10.4097/kja.21295 (PMC8831432; doi:10.4097/kja.21295), 2021-10-08

**Supplementary Digital Content 6. (A) Funnel plot and (B) forest plot of overall complications (CD1 and above, using Wang et al's data on anastomotic leak) ( $p < 0.001$ )**

**(A)**

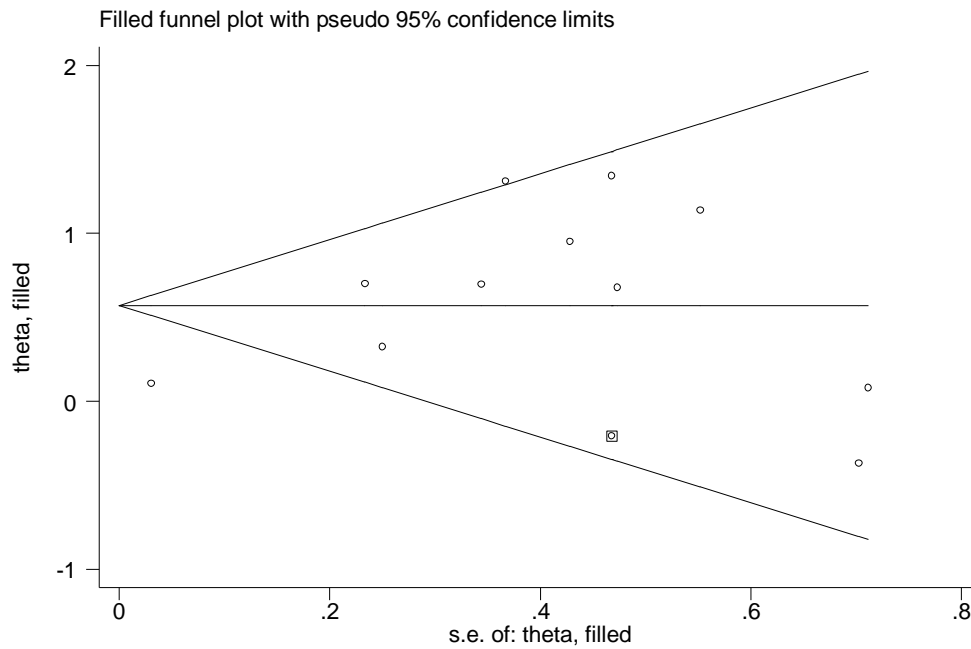

**(B)**

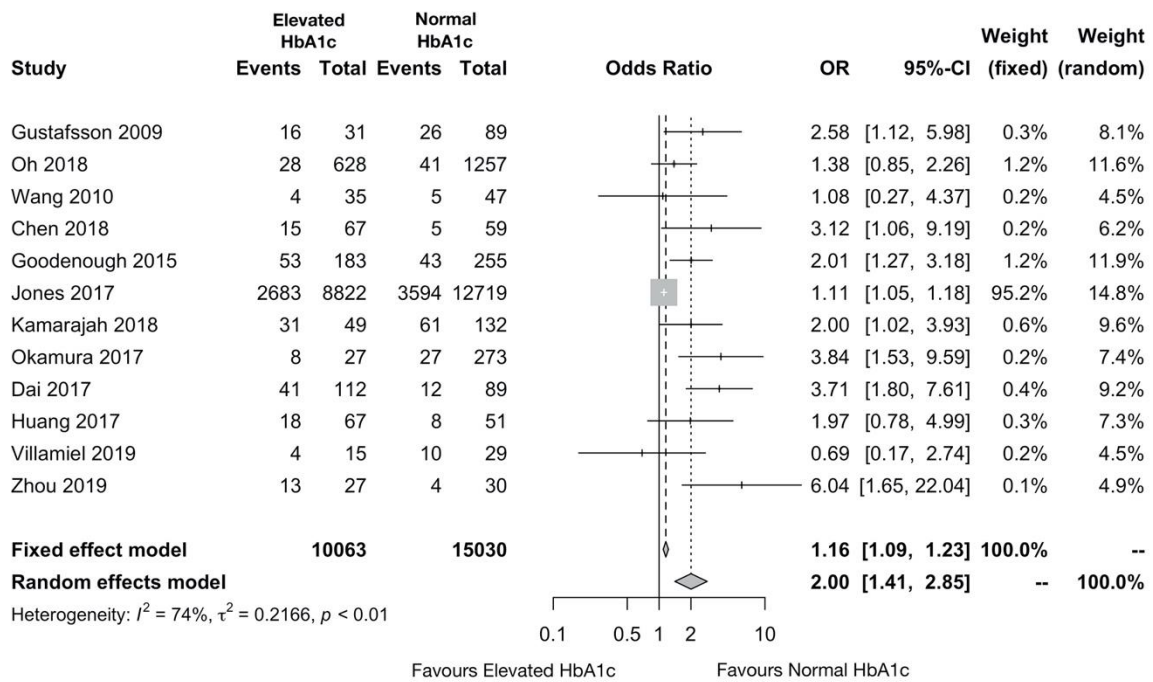

Supplement: kja-21295-suppl6.pdf [file kja-21295-suppl6.pdf]
