# Supplementary figures and images for: The impact of preoperative glycated hemoglobin (HbA1c) on postoperative complications after elective major abdominal surgery: a meta-analysis
Source: PubMed Central journal article supplement — Korean J Anesthesiol. 2021 Oct 8;75(1):47–60. doi: 10.4097/kja.21295 (PMC8831432; doi:10.4097/kja.21295), 2021-10-08

Supplementary Digital Content 10. (A) Funnel plot and (B) forest plot of all pneumonia (P = 0.026)

(A)

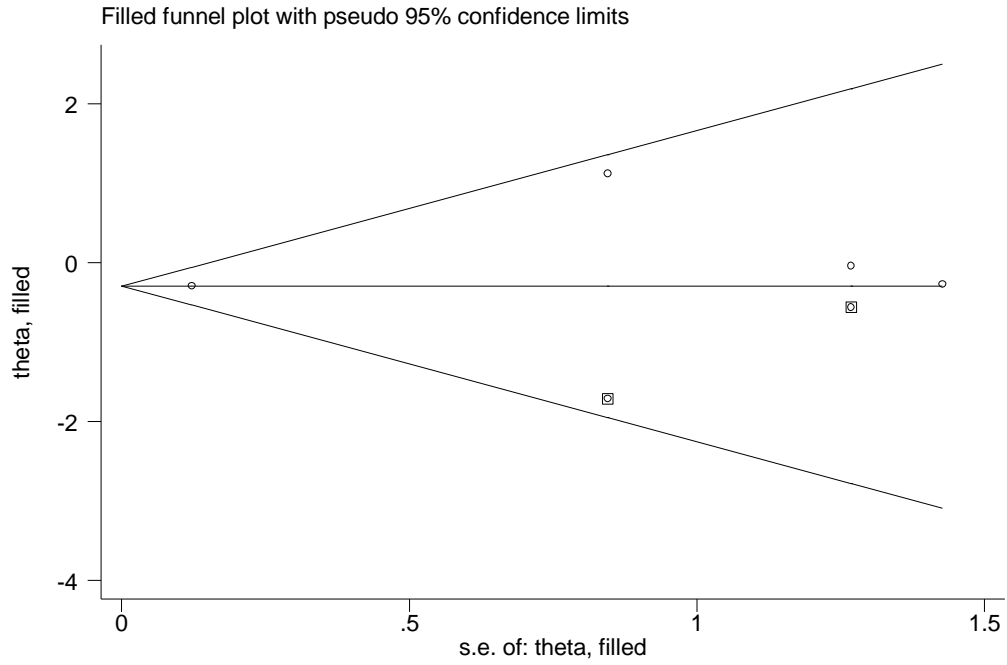

(B)

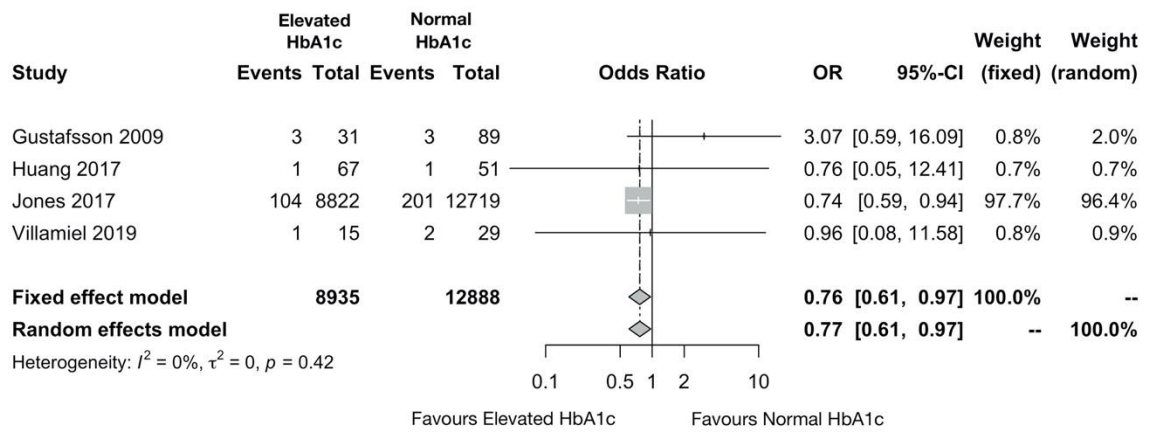

Supplement: kja-21295-suppl10.pdf [file kja-21295-suppl10.pdf]

Supplementary Digital Content 4. Funnel plot of major postoperative complications

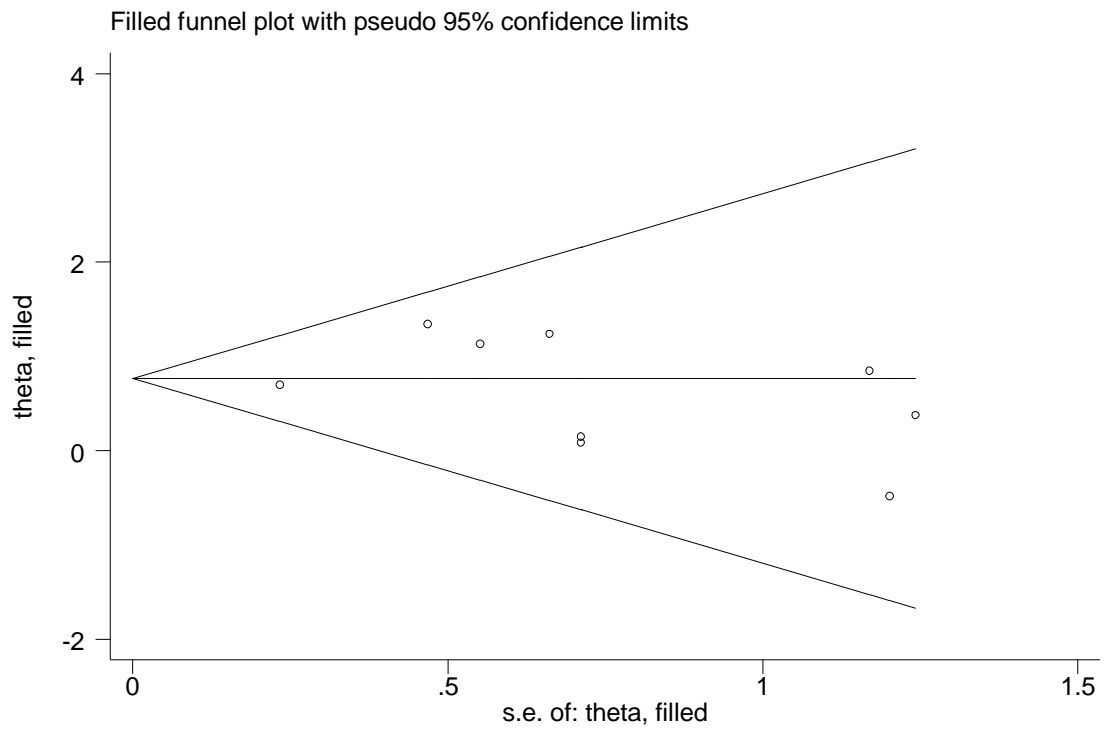

Supplement: kja-21295-suppl4.pdf [file kja-21295-suppl4.pdf]

Supplementary Digital Content 7. Funnel plot of all anastomotic leaks.

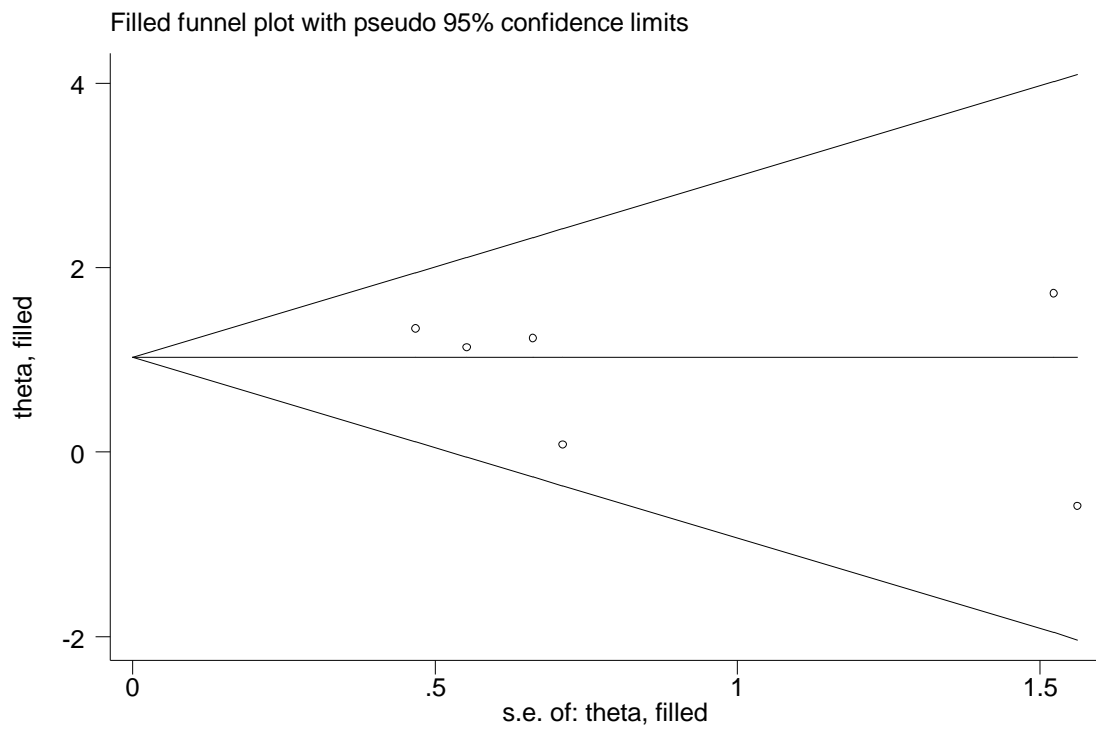

Supplement: kja-21295-suppl7.pdf [file kja-21295-suppl7.pdf]

**Supplementary Digital Content 8. Funnel plot of all infectious complications.**

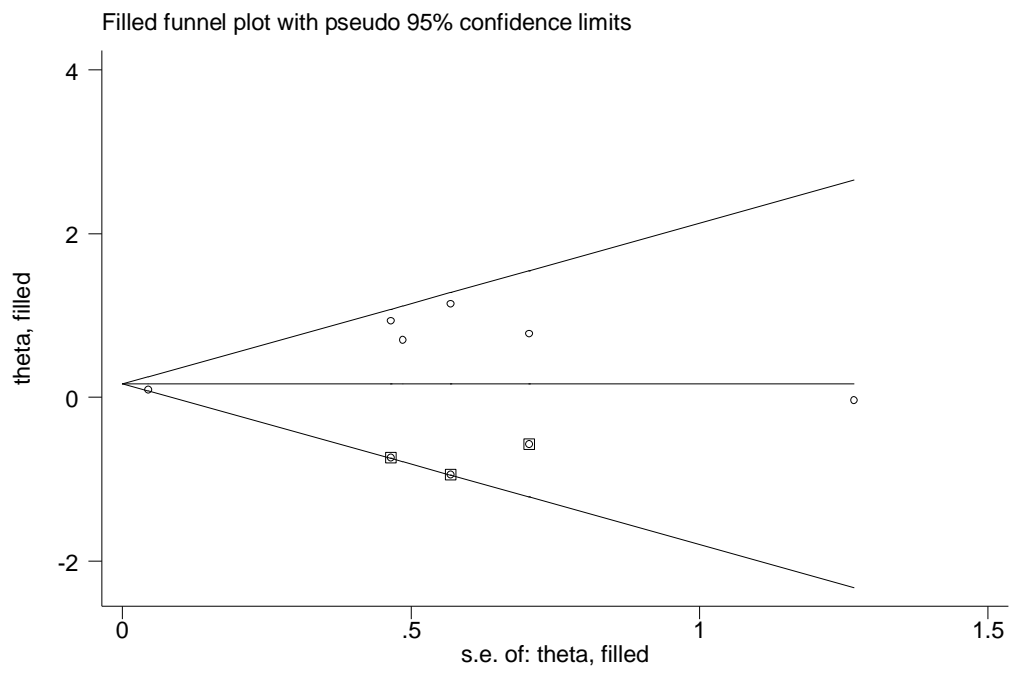

Supplement: kja-21295-suppl8.pdf [file kja-21295-suppl8.pdf]
